# Supplementary material
Source: PubMed Central journal article supplement (PMC2287368)

**Supplemental figure 1.** Hierarchical clustering of roots transcripts identified by the LNO<sub>3</sub><sup>-</sup> vs SNO<sub>3</sub><sup>-</sup> comparison, as a function of the responses to the various treatments. Only annotated transcripts with fold changes >4 of are presented.

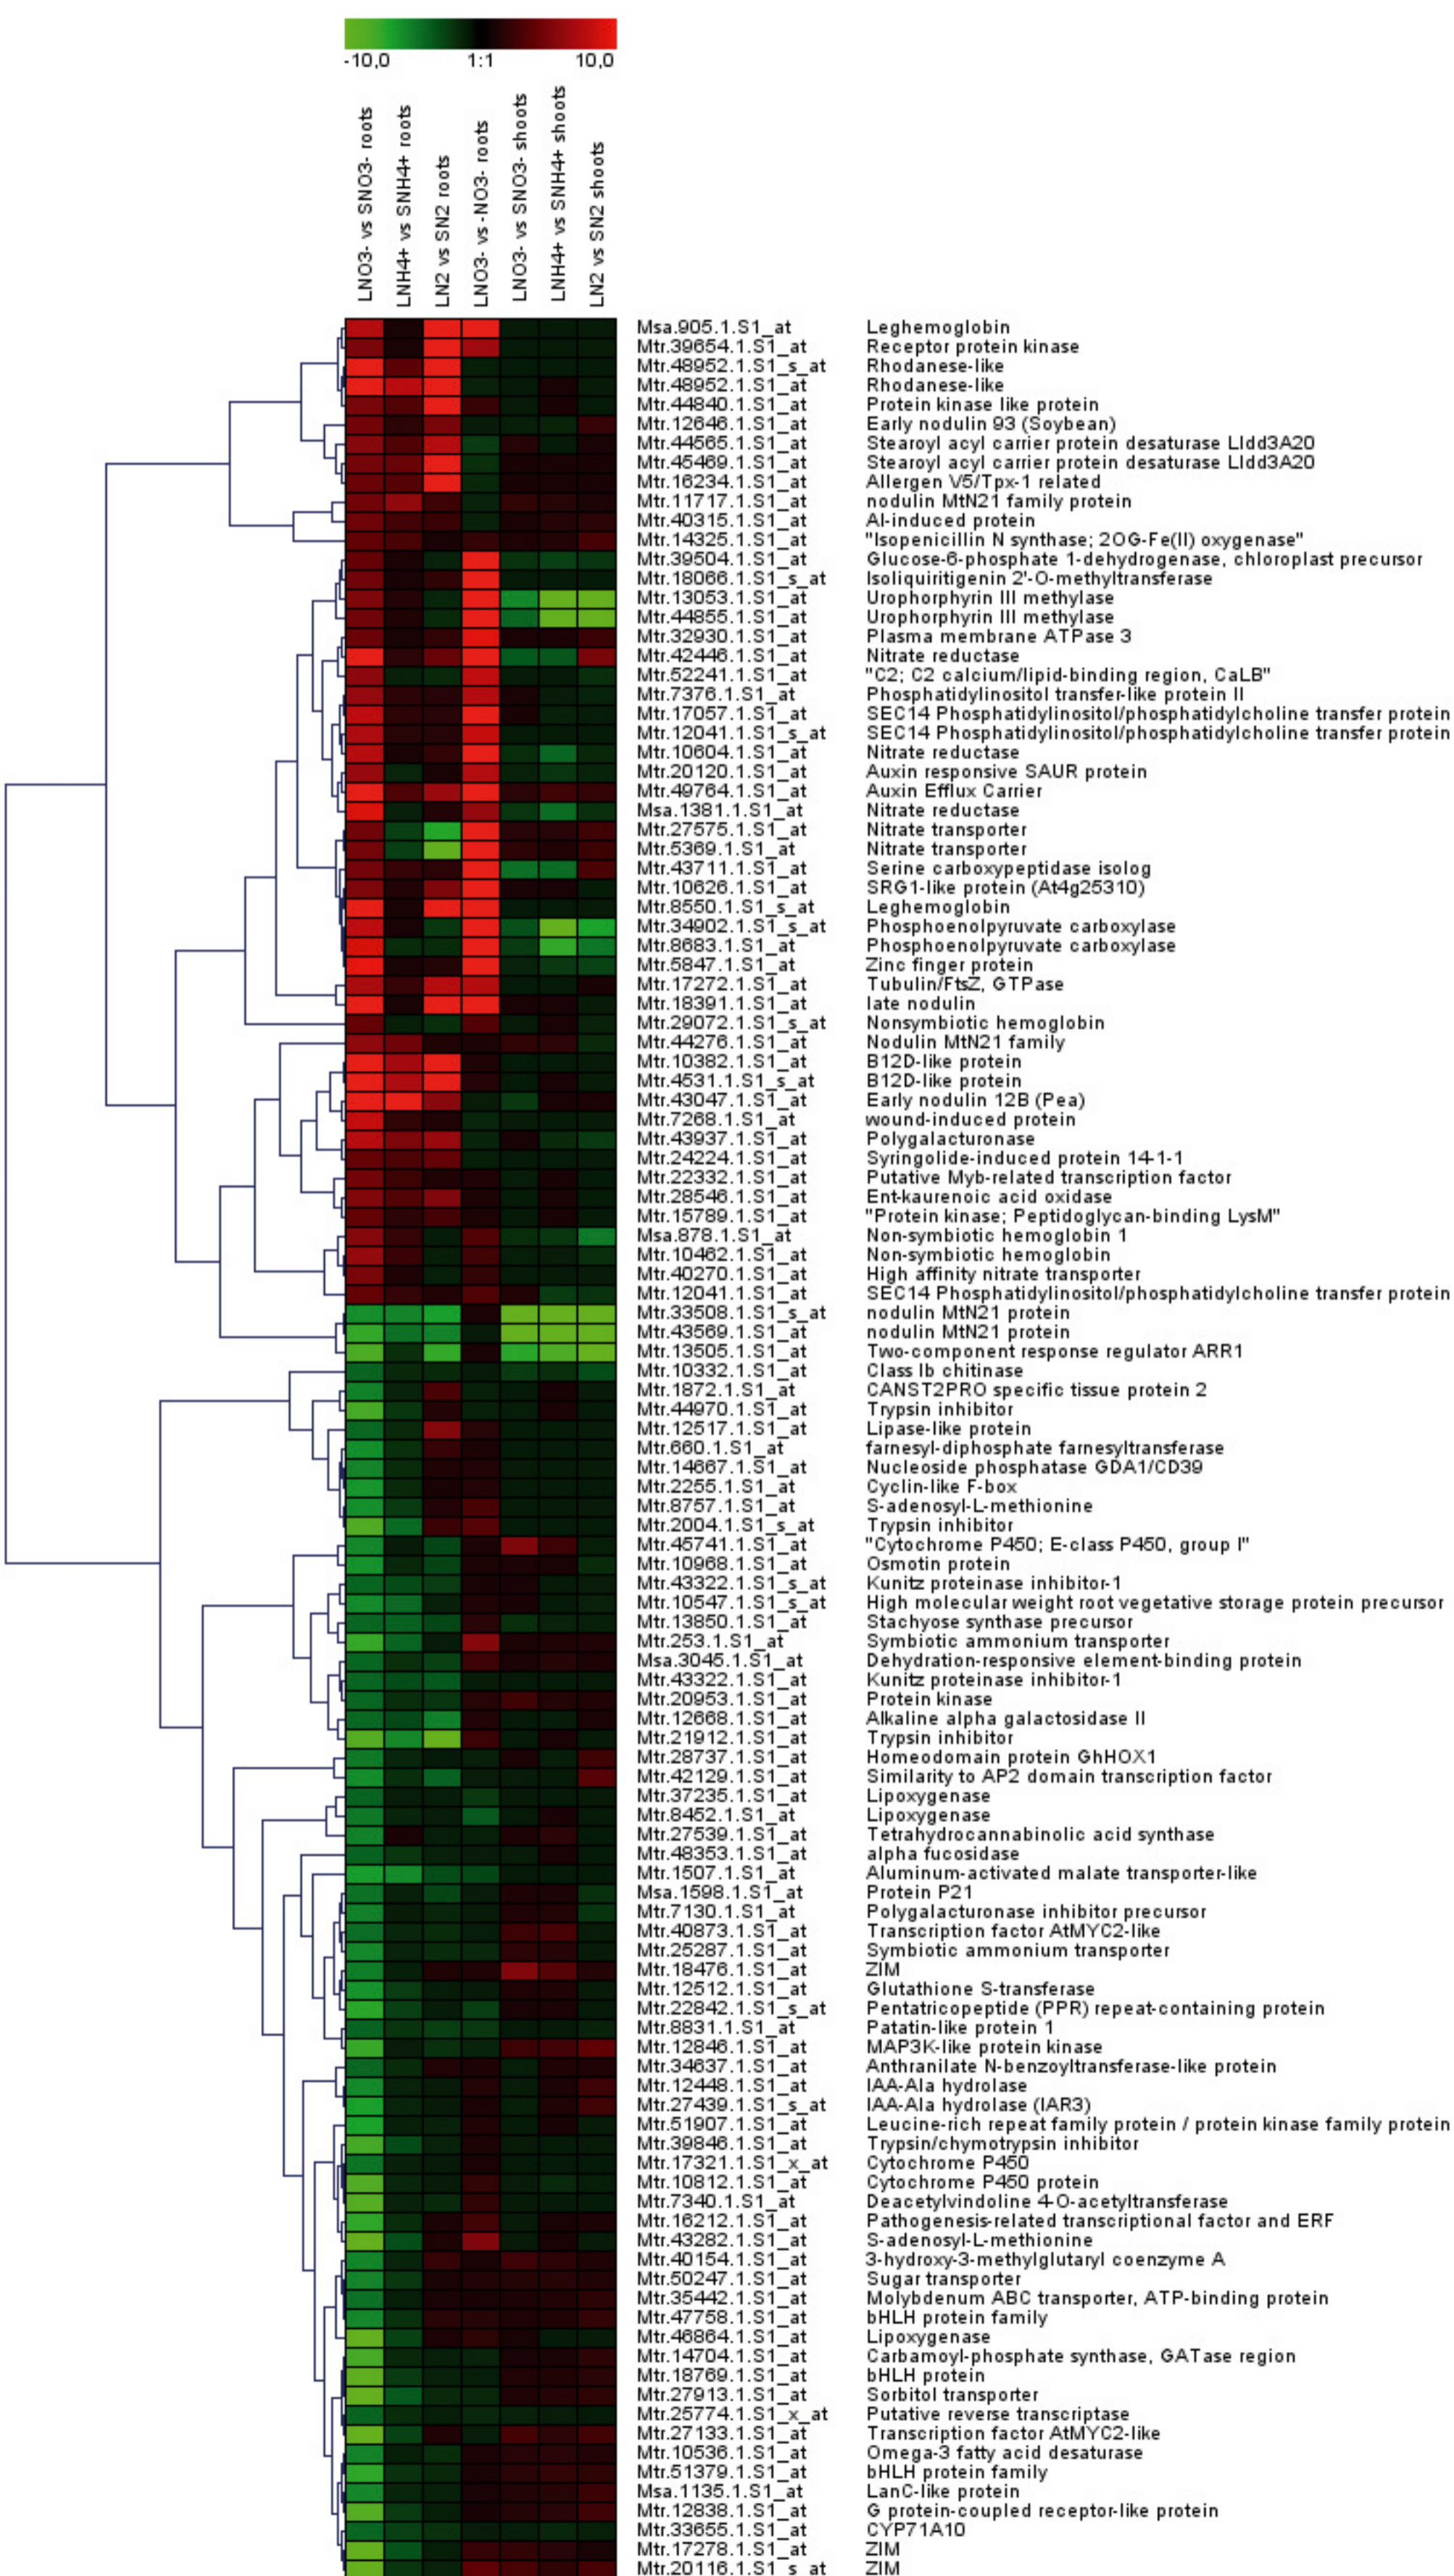

Supplement: plntphys_pp.107.115667_1.pdf [file plntphys_pp.107.115667_1.pdf]
