# Supplementary material
Source: PubMed Central journal article supplement (PMC2287368)

**Supplemental figure 2** Hierarchical clustering of roots transcripts identified by the  $\text{LNH}_4^+$  vs  $\text{SNH}_4^+$  comparison, as a function of the responses to the various treatments. Only annotated transcripts with fold changes  $\geq 4$  of are presented.

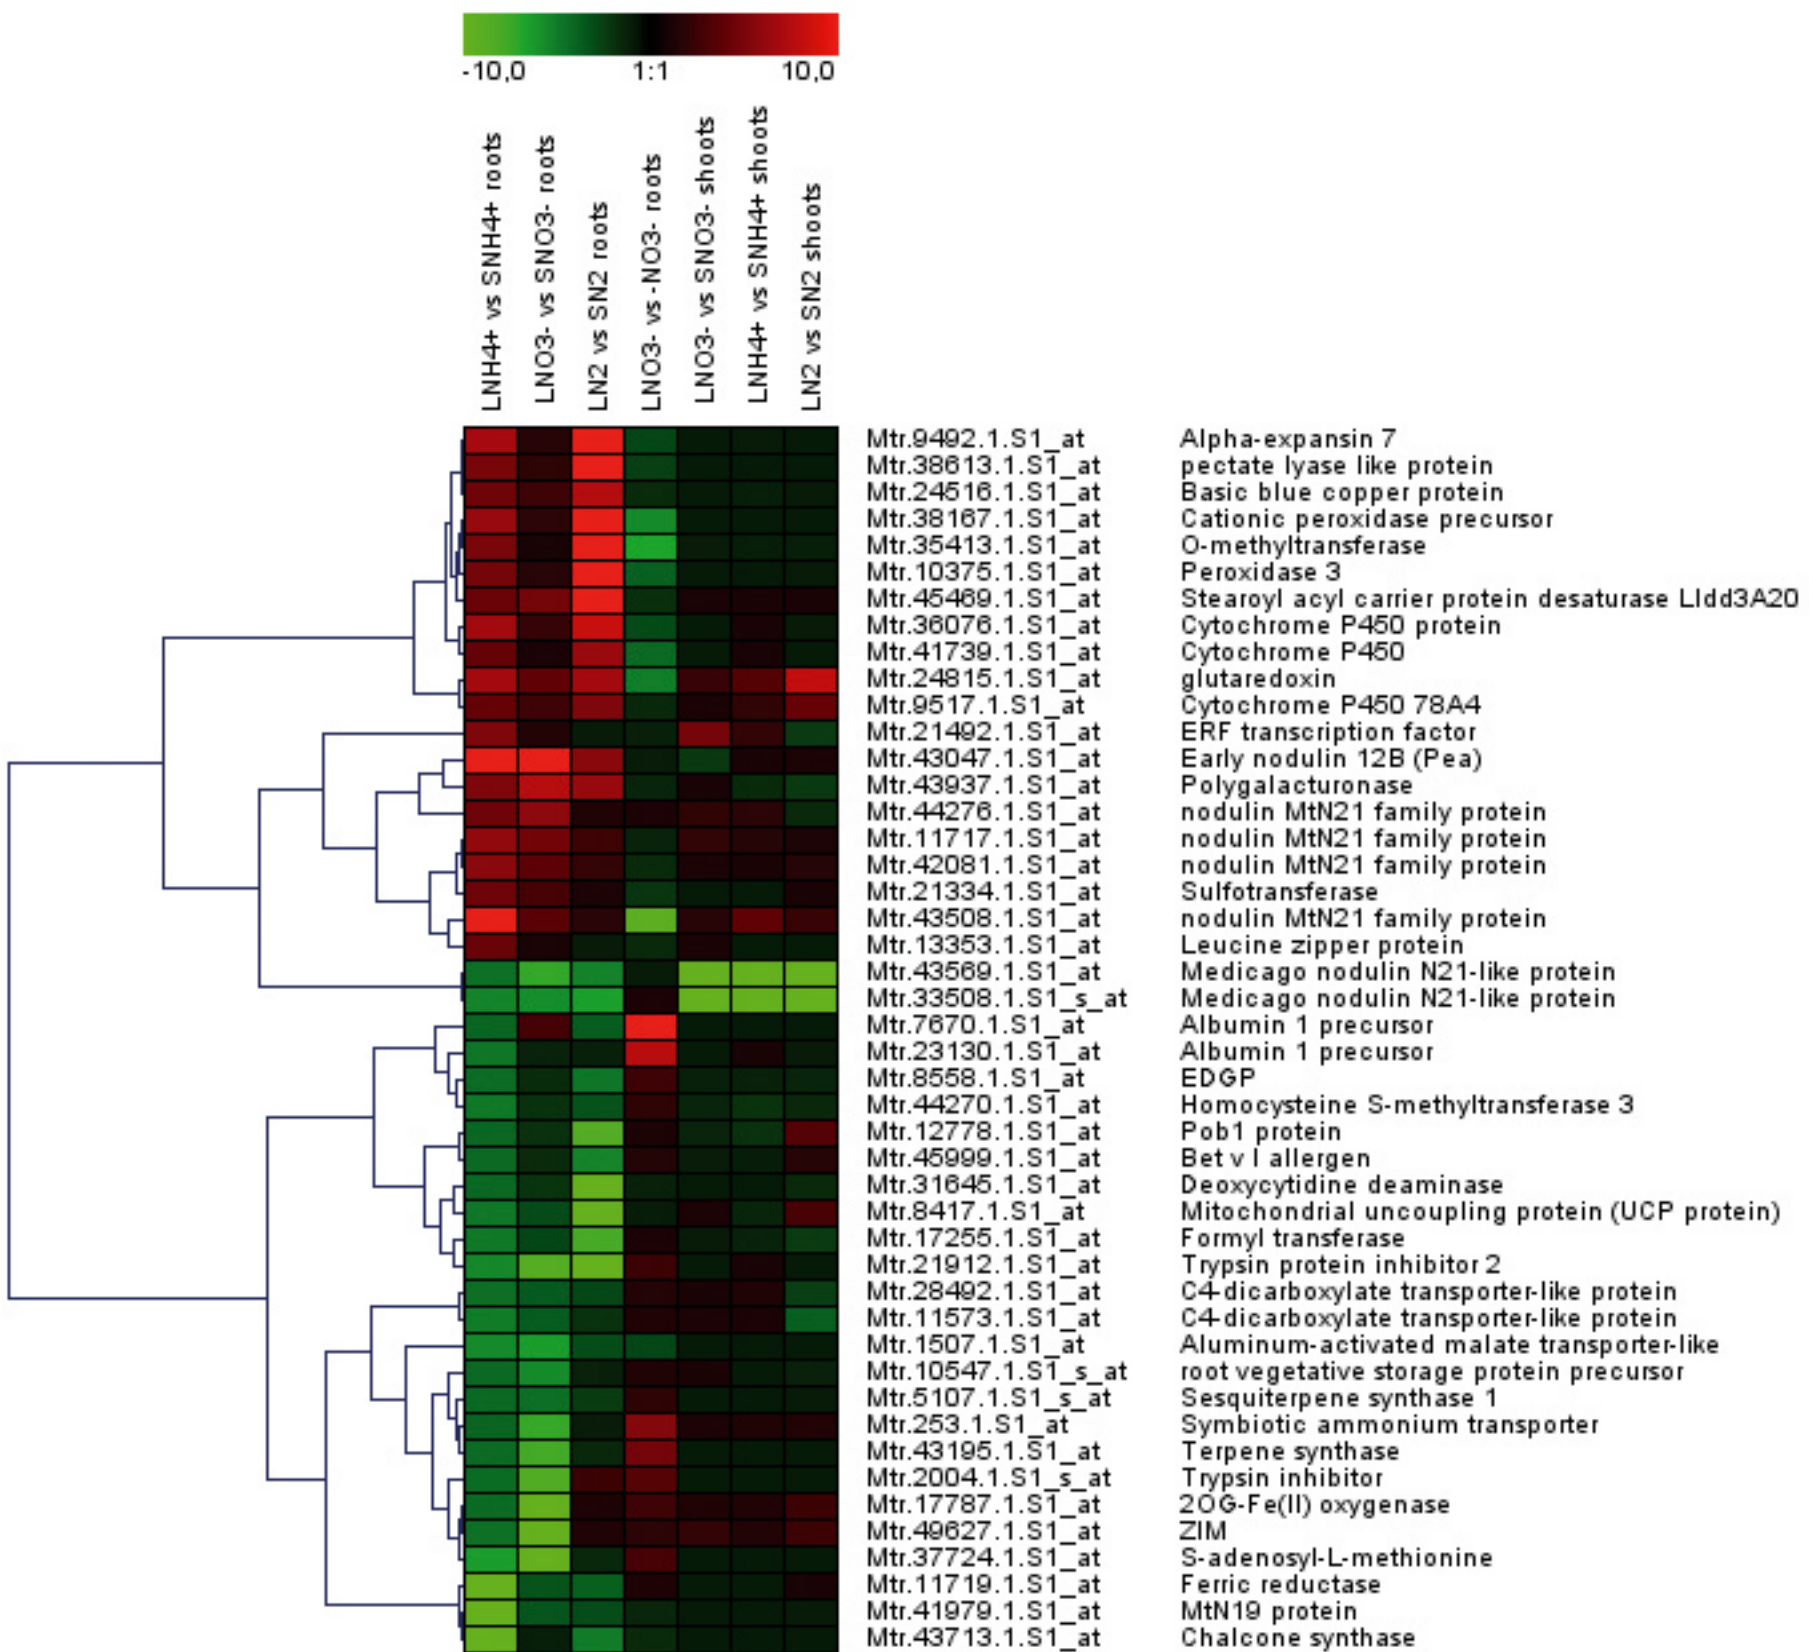

Supplement: plntphys_pp.107.115667_2.pdf [file plntphys_pp.107.115667_2.pdf]
