# Supplementary material
Source: PubMed Central journal article supplement (PMC2287368)

**Supplemental figure 3.** Hierarchical clustering of roots transcripts identified by the LN<sub>2</sub>- vs SN<sub>2</sub> comparison, as a function of the responses to the various treatments. Only annotated transcripts with fold changes >4 of are presented. Nodule specific transcripts have not been included.

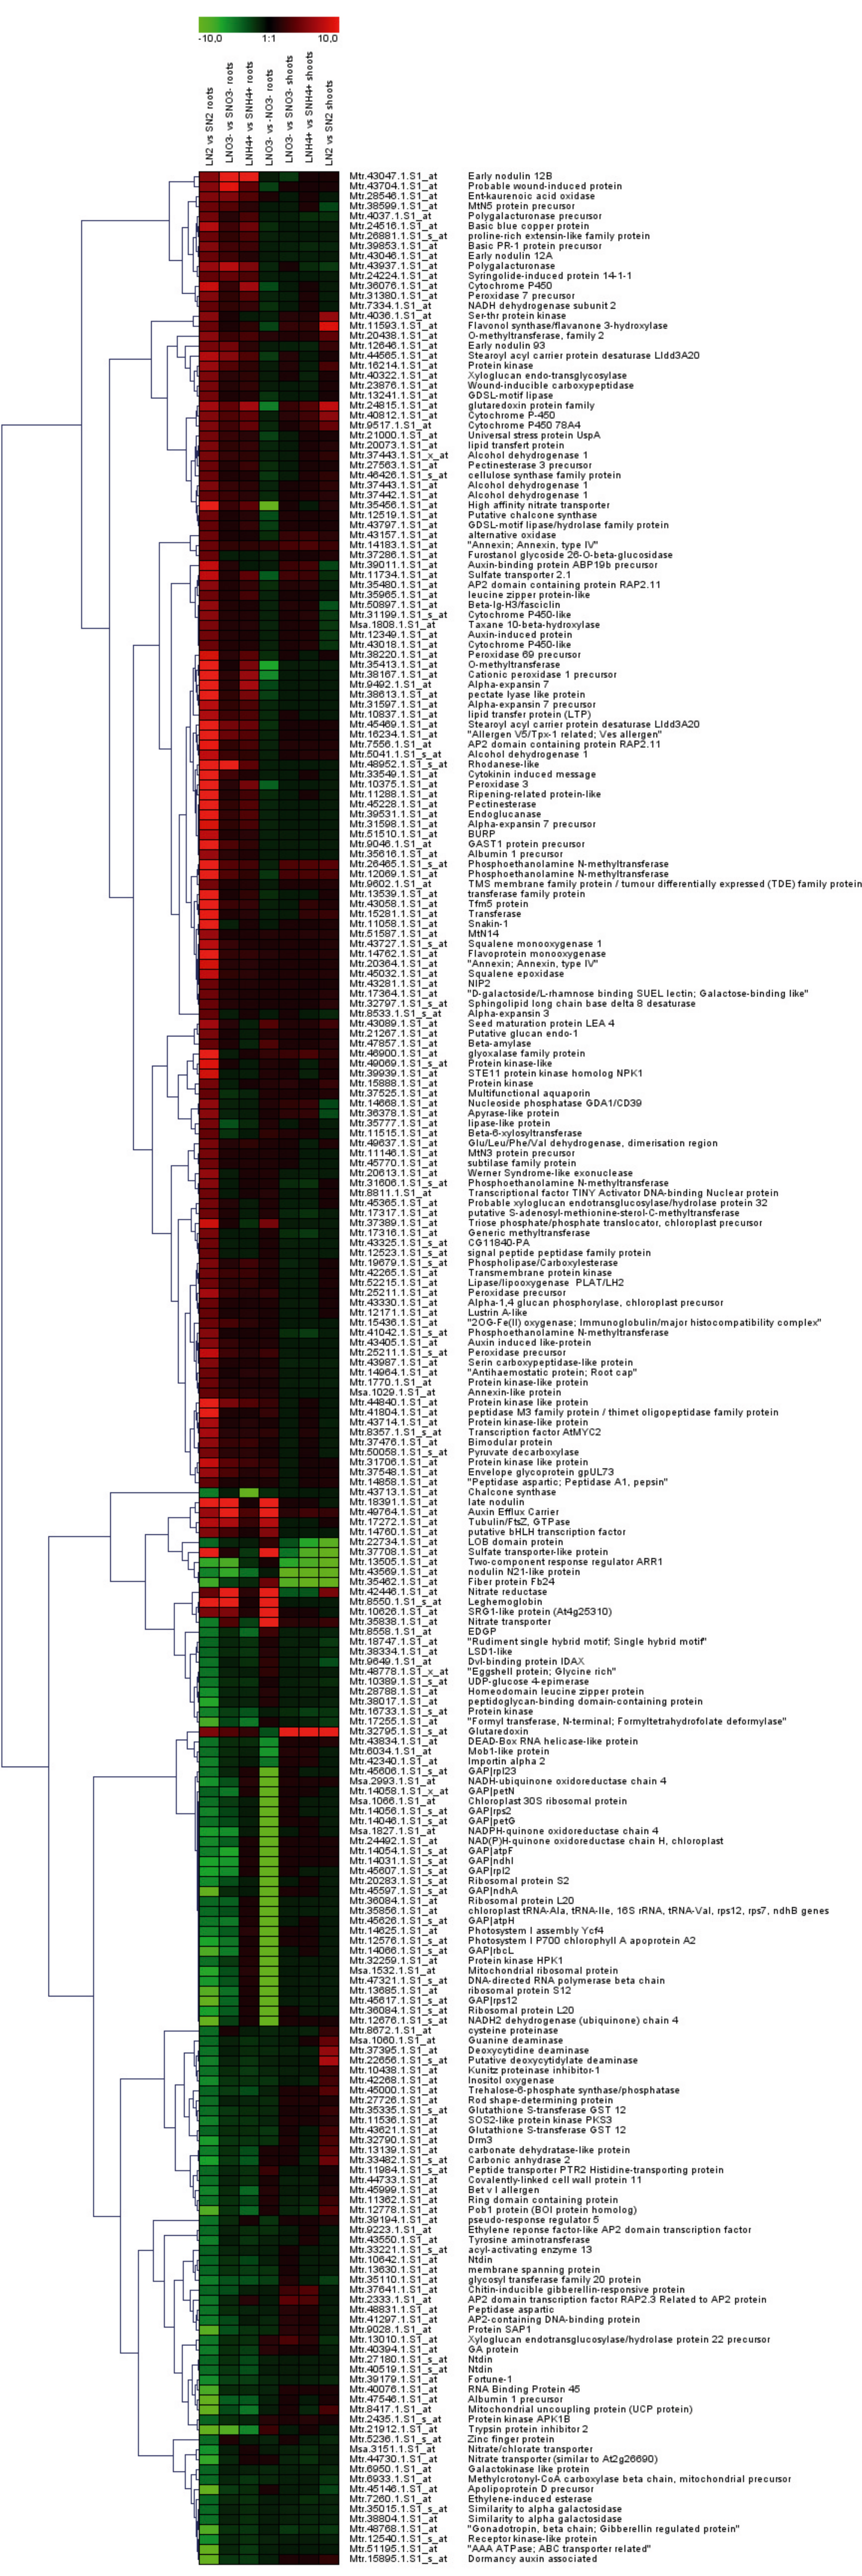

Supplement: plntphys_pp.107.115667_3.pdf [file plntphys_pp.107.115667_3.pdf]
