# Supplementary material
Source: PubMed Central journal article supplement (PMC2287368)
Supplement: plntphys_pp.107.115667_4.pdf [file plntphys_pp.107.115667_4.pdf]

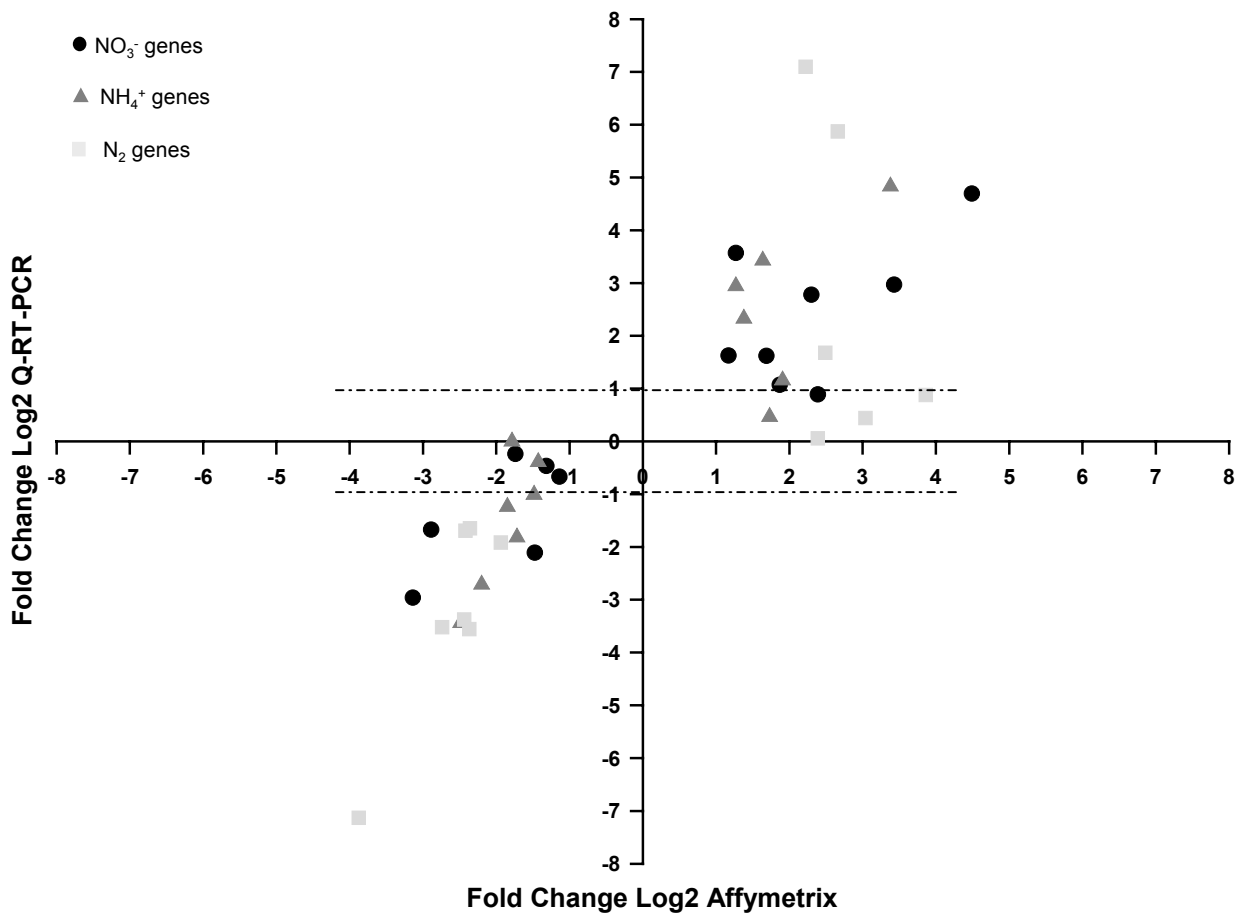

**Supplemental Figure 4.** Analysis by Q-RT-PCR of the accumulation of differentially accumulated transcripts, initially identified by Affymetrix GeneChip analysis, on a third set of biological replicates.
